# Supplementary material
Source: PubMed Central journal article supplement (PMC3261328)

# Supp. Table S1

|                     | QIIME De-multiplexing            |                                  |                                  |                                  | OCTUPUS De-multiplexing           |                                  |                                   |                                  |                                   |                                  |                                   |                                  | AmpliconNoise                    |                                  |
|---------------------|----------------------------------|----------------------------------|----------------------------------|----------------------------------|-----------------------------------|----------------------------------|-----------------------------------|----------------------------------|-----------------------------------|----------------------------------|-----------------------------------|----------------------------------|----------------------------------|----------------------------------|
|                     | 18S Region 1                     |                                  | 18S Region 2                     |                                  | 18S Region 1                      |                                  |                                   |                                  | 18S Region 2                      |                                  |                                   |                                  | 18S Region 1                     |                                  |
|                     | Forward (A)<br>Adapter<br>>199bp | Reverse (B)<br>Adapter<br>>199bp | Forward (A)<br>Adapter<br>>199bp | Reverse (B)<br>Adapter<br>>199bp | Forward (A)<br>Adapter<br>Trimmed | Reverse (B)<br>Adapter<br>>199bp | Forward (A)<br>Adapter<br>>199bp | Reverse (B)<br>Adapter<br>>199bp |
| <b>Pacific128</b>   | 27,745                           | 28,281                           | 30,961                           | 32,701                           | 36,642                            | 30,364                           | 40,066                            | 38,243                           | 35,369                            | 33,469                           | 41,966                            | 38,871                           | -                                | -                                |
| <b>Pacific237</b>   | 22,929                           | 19,701                           | 11,164                           | 11,825                           | 28,870                            | 26,859                           | 14,055                            | 13,344                           | 25,352                            | 23,792                           | 14,811                            | 13,711                           | -                                | -                                |
| <b>Pacific321</b>   | 37,364                           | 35,380                           | 20,391                           | 23,804                           | 45,489                            | 41,988                           | 24,985                            | 23,872                           | 42,911                            | 41,172                           | 28,662                            | 27,126                           | -                                | -                                |
| <b>Pacific422</b>   | 25,911                           | 23,968                           | 6,391                            | 8,650                            | 32,617                            | 29,807                           | 9,921                             | 9,362                            | 29,746                            | 28,403                           | 11,450                            | 9,905                            | -                                | -                                |
| <b>Pacific528</b>   | 33,969                           | 26,495                           | 10,592                           | 11,776                           | 41,980                            | 38,996                           | 14,197                            | 13,547                           | 37,644                            | 35,858                           | 14,859                            | 14,029                           | -                                | -                                |
| <b>Atlantic22#1</b> | 1,711                            | 770                              | 1,259                            | 1,597                            | 2,351                             | 2,177                            | 1,622                             | 1,518                            | 2,563                             | 2,464                            | 2,117                             | 1,980                            | 1,403                            | 688                              |
| <b>Atlantic25#2</b> | 13,989                           | 12,796                           | 4,623                            | 5,823                            | 17,236                            | 15,652                           | 6,563                             | 6,300                            | 15,935                            | 15,087                           | 7,252                             | 6,798                            | 10,502                           | 11,253                           |
| <b>Atlantic29</b>   | 25,756                           | 24,421                           | 17,850                           | 23,228                           | 32,123                            | 30,139                           | 23,833                            | 22,669                           | 30,229                            | 28,945                           | 29,241                            | 27,528                           | -                                | -                                |
| <b>Atlantic43</b>   | 22,730                           | 21,076                           | 20,348                           | 20,849                           | 28,802                            | 26,654                           | 25,562                            | 23,478                           | 27,176                            | 25,897                           | 26,795                            | 25,102                           | -                                | -                                |
| <b>Atlantic45</b>   | 20,472                           | 19,107                           | 14,074                           | 15,310                           | 25,399                            | 23,733                           | 17,876                            | 16,823                           | 23,955                            | 22,853                           | 19,360                            | 18,159                           | -                                | -                                |
| <b>ShallowCalif</b> | 39,181                           | 35,928                           | 23,836                           | 23,377                           | 49,541                            | 45,224                           | 28,985                            | 27,745                           | 44,591                            | 42,203                           | 28,925                            | 27,303                           | -                                | -                                |
| <b>ShallowGulf</b>  | 34,421                           | 34,445                           | 20,516                           | 19,852                           | 44,247                            | 38,785                           | 26,884                            | 25,355                           | 41,840                            | 40,199                           | 25,136                            | 23,607                           | -                                | -                                |

|                     | <b>Sediment</b> | <b>Collection</b> | <b>Latitude</b> | <b>Longitude</b> | <b>Depth</b> |
|---------------------|-----------------|-------------------|-----------------|------------------|--------------|
| <b>Pacific128</b>   | Fine mud        | 16-Sep-08         | 43° 59.971' N   | 130° 23.531' W   | 3200 m       |
| <b>Pacific237</b>   | Fine mud        | 18-Sep-08         | 42° 33.588' N   | 131° 55.040' W   | 3585 m       |
| <b>Pacific321</b>   | Fine mud        | 21-Sep-08         | 39° 59.400' N   | 125° 52.406' W   | 3664 m       |
| <b>Pacific422</b>   | Fine mud        | 21-Sep-08         | 39° 59.695' N   | 125° 26.385' W   | 2712 m       |
| <b>Pacific528</b>   | Fine mud        | 23-Sep-08         | 36° 48.024' N   | 123° 41.774' W   | 3678 m       |
| <b>Atlantic22#1</b> | Fine mud        | 15-Aug-08         | 35° 33.28' N    | 9° 41.92' W      | 4321 m       |
| <b>Atlantic25#2</b> | Fine mud        | 16-Aug-08         | 35° 44.75' N    | 9° 59.27' W      | 4630 m       |
| <b>Atlantic29</b>   | Fine mud        | 17-Aug-08         | 36° 13.06' N    | 10° 01.82' W     | 4878 m       |
| <b>Atlantic43</b>   | Fine mud        | 22-Aug-08         | 38° 21.66' N    | 9° 59.08' W      | 4572 m       |
| <b>Atlantic45</b>   | Fine mud        | 23-Aug-08         | 38° 23.18' N    | 10° 24.13' W     | 4835 m       |
| <b>ShallowCalif</b> | Medium sand     | 4-Jul-08          | 31° 1.509' N    | 114° 49.912' W   | intertidal   |
| <b>ShallowGulf</b>  | Fine sand       | 3-Jul-08          | 27° 54.348' N   | 97° 2.906' W     | 3m           |

1 **Table S2:**

| Taxa                   | Region 1     | Region 2     | Region 1      | Region 2      |
|------------------------|--------------|--------------|---------------|---------------|
|                        | 95%          | 95%          | 99%           | 99%           |
| Metazoa                | 1,360        | 1,461        | 43,255        | 25,668        |
| <i>Nematoda</i>        | 765          | 879          | 27,020        | 15,518        |
| <i>Annelida</i>        | 217          | 197          | 7,073         | 3,869         |
| <i>Arthropoda</i>      | 128          | 178          | 2,280         | 2,323         |
| <i>Platyhelminthes</i> | 83           | 71           | 3,330         | 2,476         |
| <i>Brachiopoda</i>     | 0            | 4            | 0             | 17            |
| <i>Bryozoa</i>         | 3            | 3            | 43            | 3             |
| <i>Chaetognatha</i>    | 0            | 0            | 0             | 1             |
| <i>Chordata</i>        | 8            | 8            | 48            | 96            |
| <i>Cnidaria</i>        | 22           | 1            | 445           | 9             |
| <i>Ctenophora</i>      | 2            | 2            | 2             | 5             |
| <i>Echinodermata</i>   | 3            | 2            | 10            | 5             |
| <i>Entoprocta</i>      | 0            | 0            | 3             | 0             |
| <i>Gastrotricha</i>    | 12           | 7            | 65            | 21            |
| <i>Gnathostomulida</i> | 0            | 10           | 1             | 38            |
| <i>Hemichordata</i>    | 14           | 4            | 1,032         | 368           |
| <i>Kinorhyncha</i>     | 4            | 9            | 34            | 275           |
| <i>Loricifera</i>      | 3            | 3            | 19            | 66            |
| <i>Mollusca</i>        | 25           | 62           | 317           | 292           |
| <i>Nematomorpha</i>    | 0            | 1            | 0             | 0             |
| <i>Nemertea</i>        | 10           | 8            | 80            | 57            |
| <i>Porifera</i>        | 40           | 2            | 820           | 5             |
| <i>Priapulida</i>      | 0            | 2            | 0             | 6             |
| <i>Rotifera</i>        | 0            | 1            | 0             | 14            |
| <i>Sipuncula</i>       | 4            | 3            | 469           | 201           |
| <i>Tardigrada</i>      | 13           | 4            | 160           | 3             |
| Fungi                  | 225          | 163          | 9,984         | 2,445         |
| Unicellular eukaryotes | 738          | 1,257        | 15,198        | 22,020        |
| Environmental          | 774          | 686          | 12,687        | 9,775         |
| No match               | 480          | 354          | 11,345        | 1,868         |
| Algae                  | 111          | 96           | 975           | 861           |
| Stramenopiles          | 137          | 146          | 1,771         | 1,583         |
| <b>Total</b>           | <b>3,825</b> | <b>4,163</b> | <b>95,215</b> | <b>64,220</b> |

2

3

# Taxonomic Proportions from Denoised Data (OCTUPUS 99%)

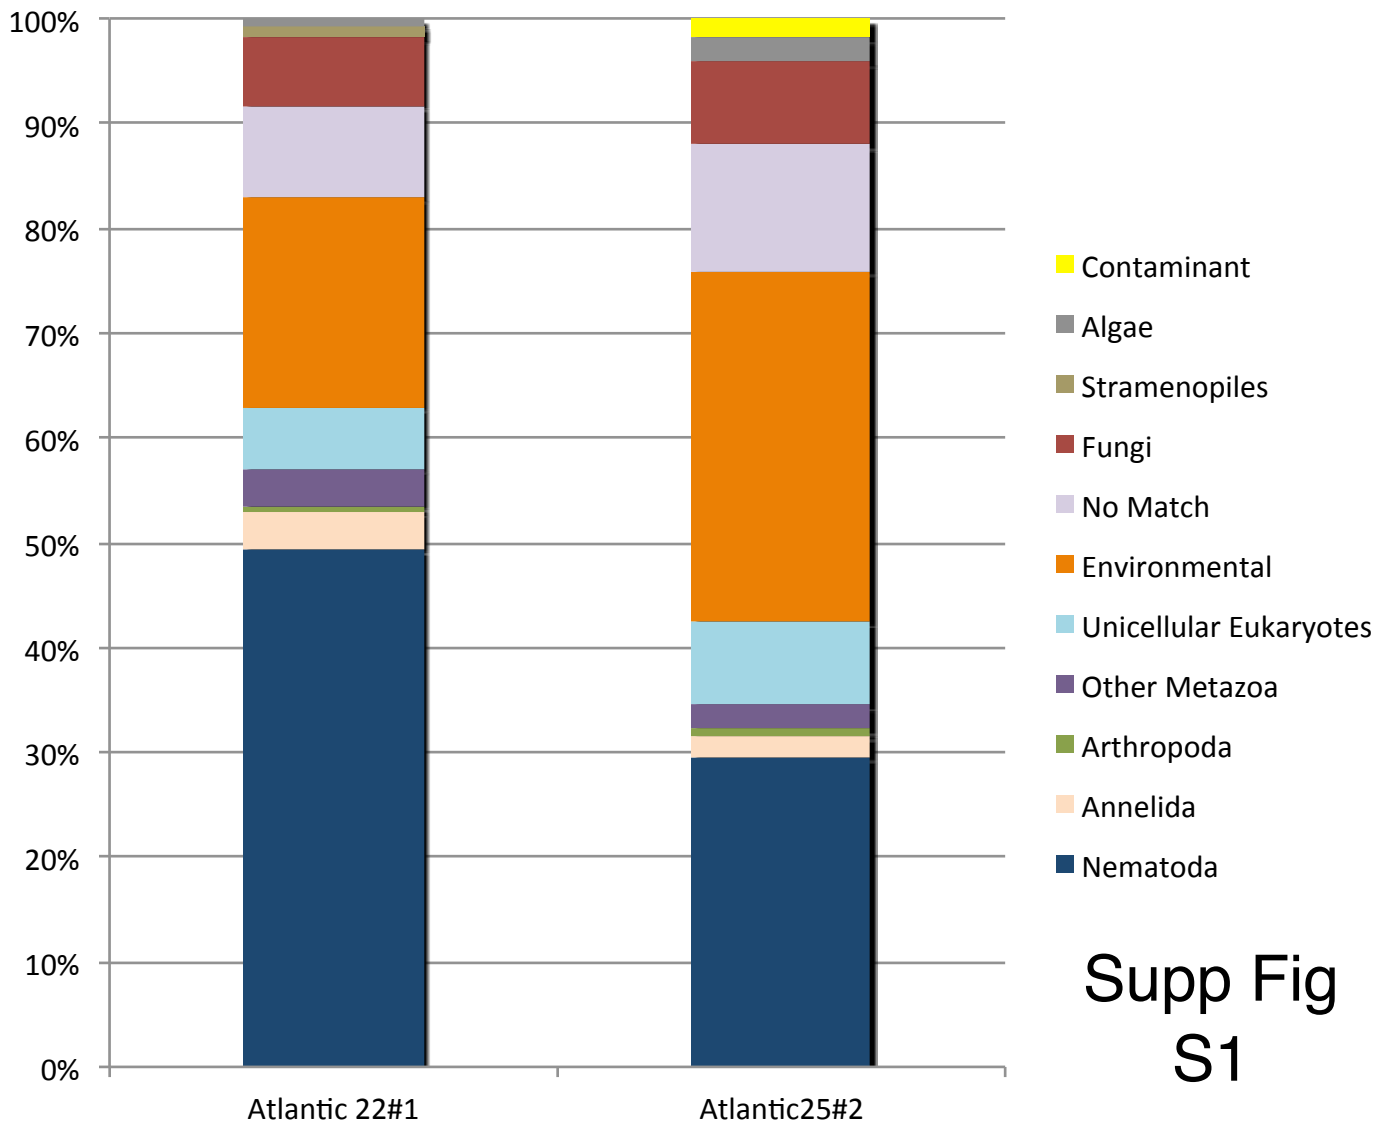

Supp Fig  
S1

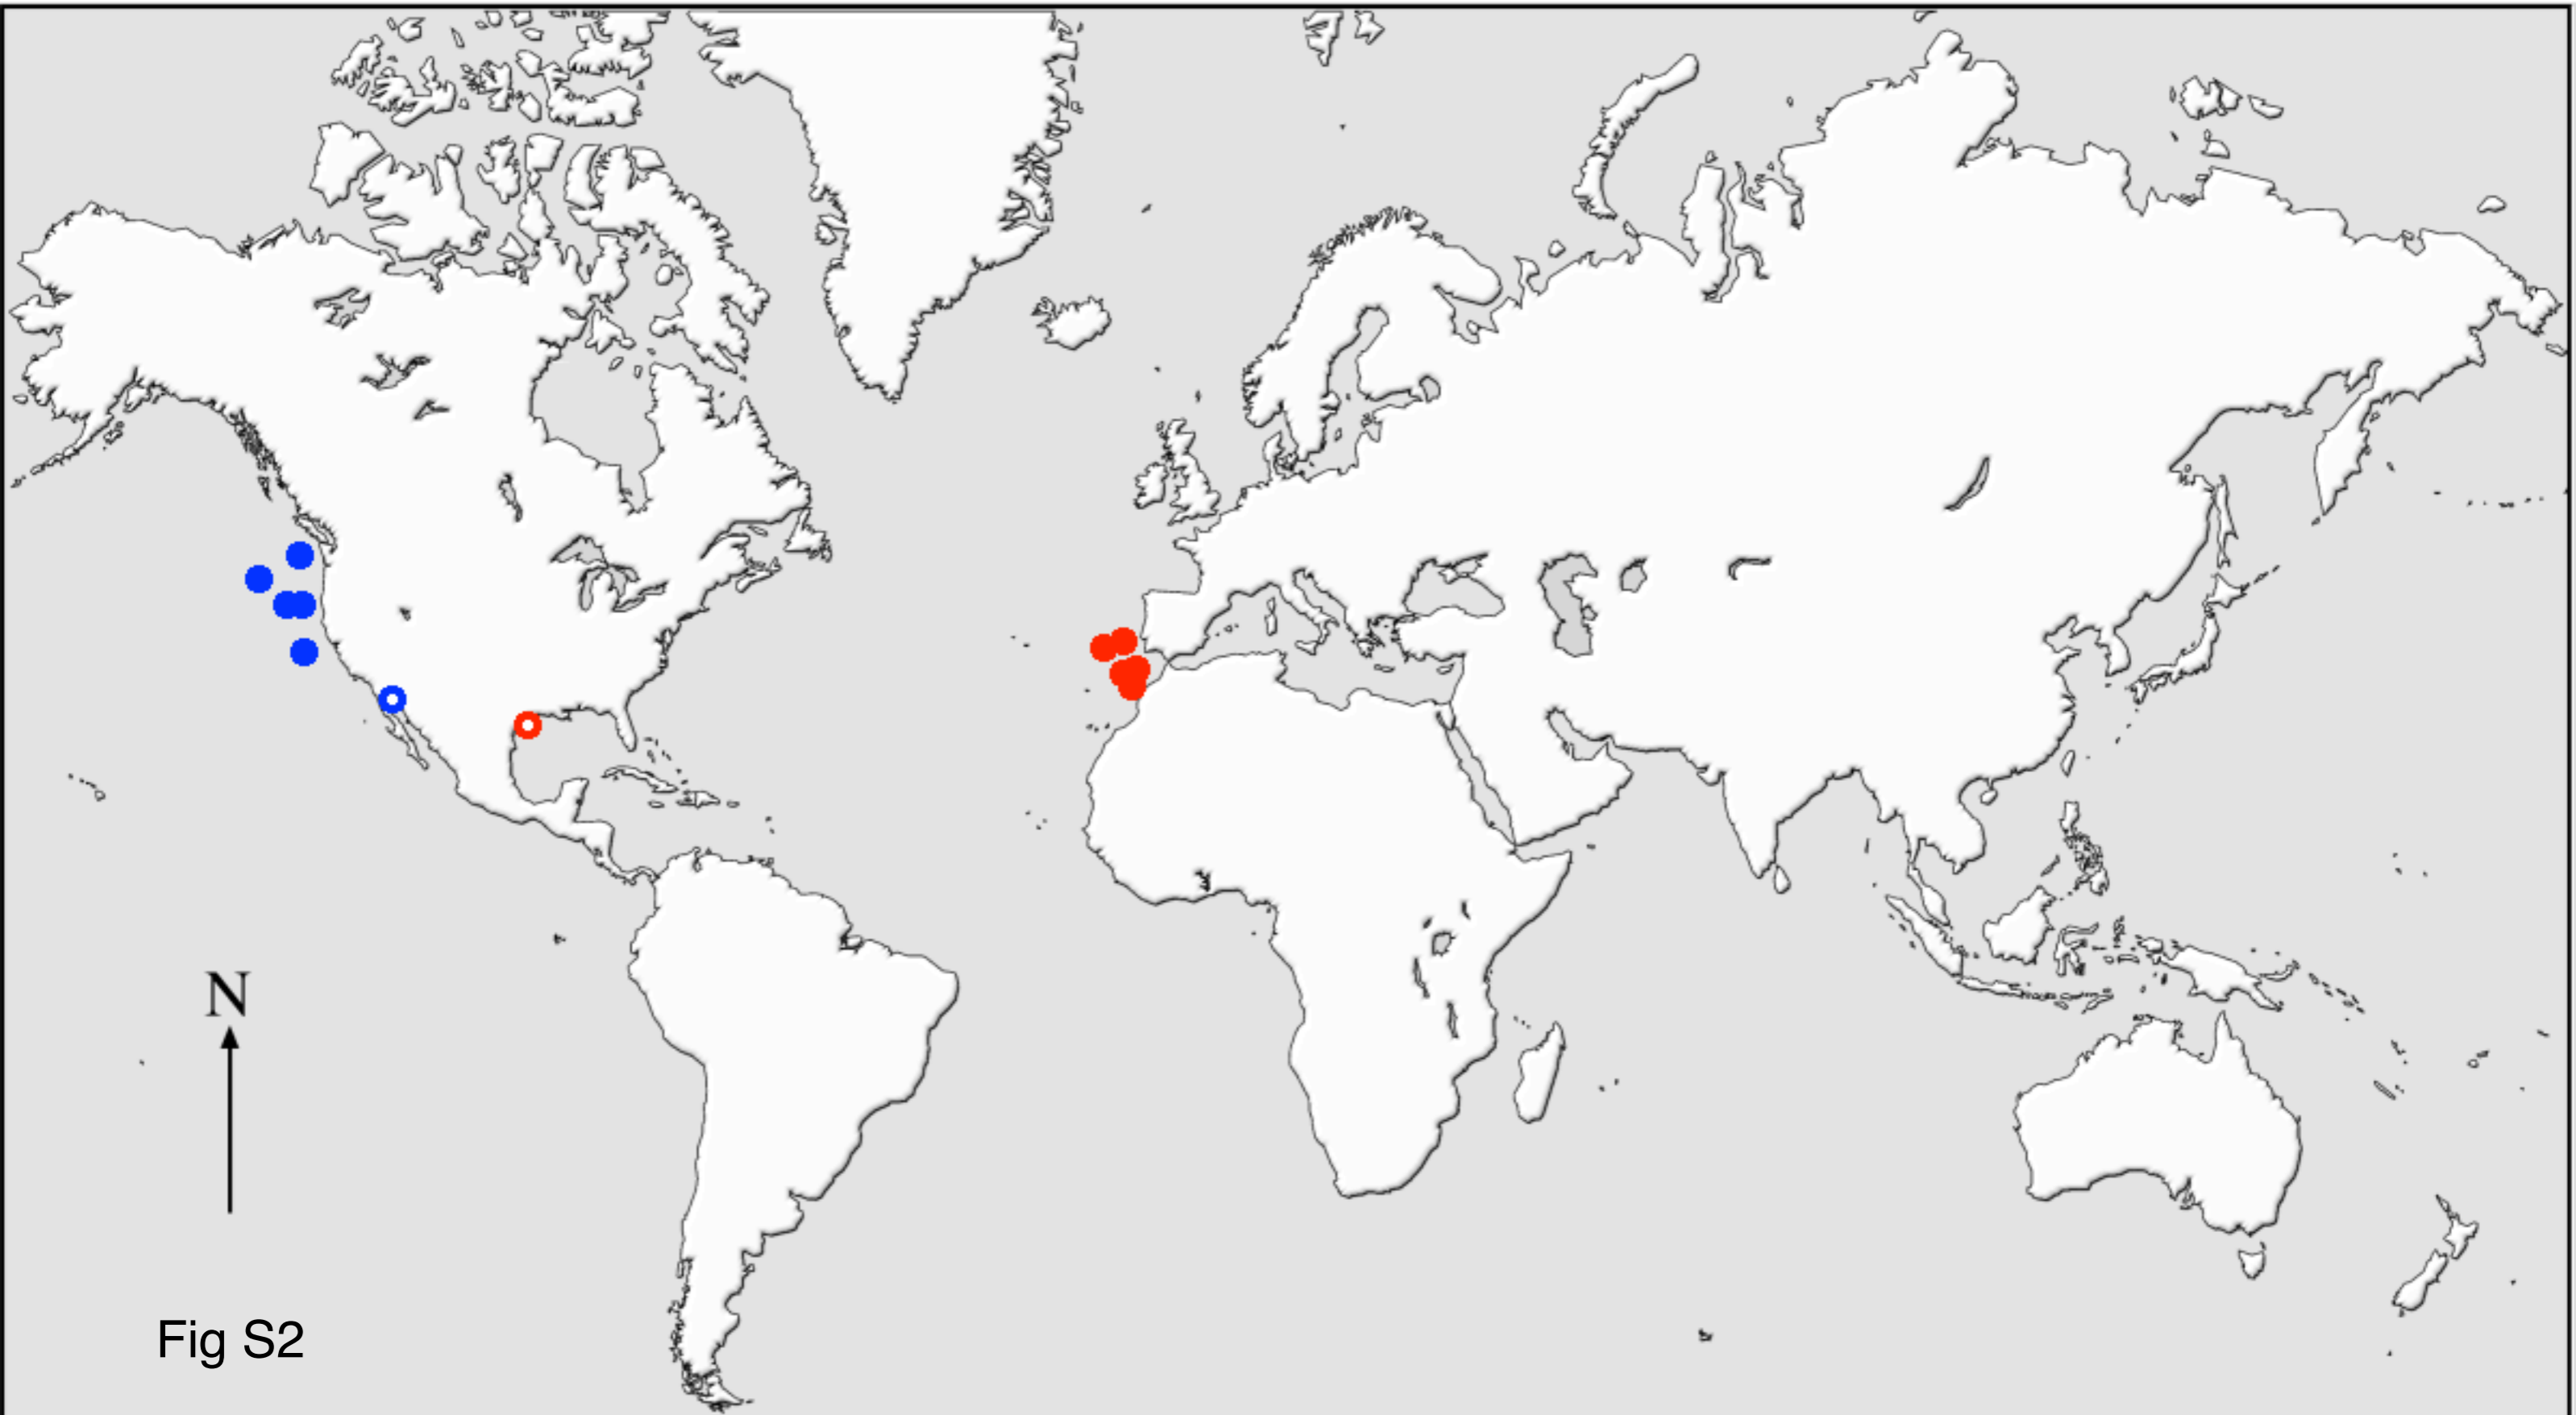

Fig S2

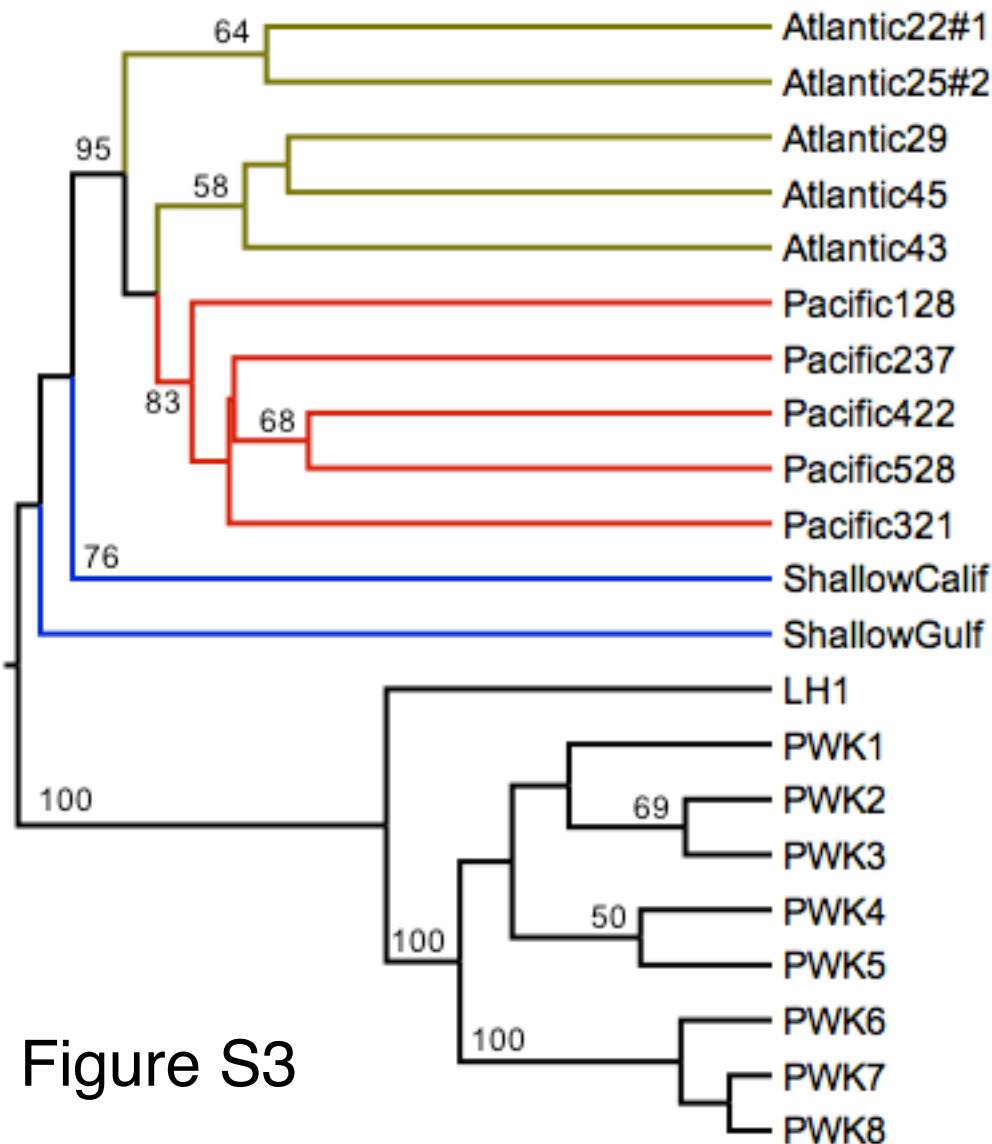

Figure S3

### UCLUST OTUs 95%

Fig S4

### Eurybathic OTUs 95%

### Cosmopolitan Deep-sea OTUs 95%

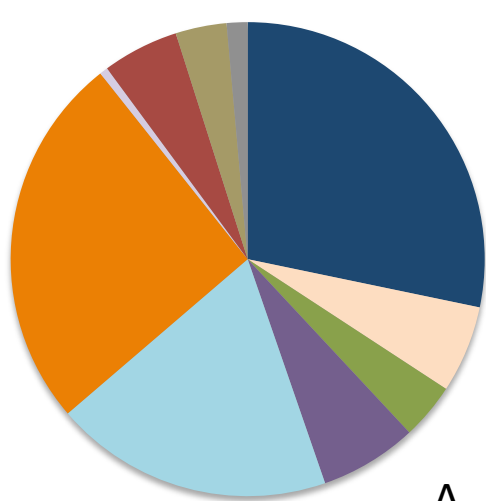

A

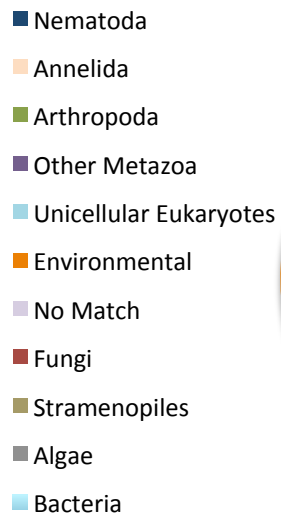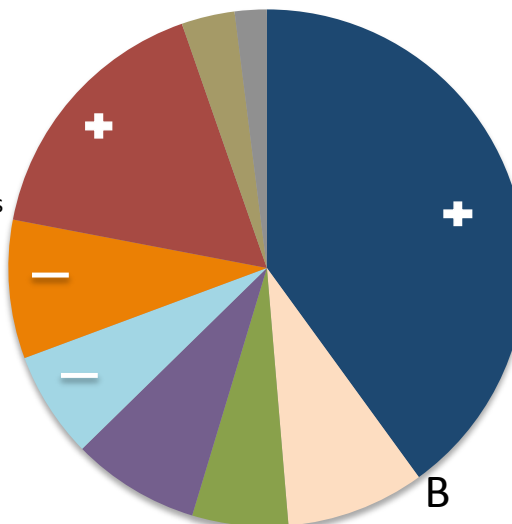

B

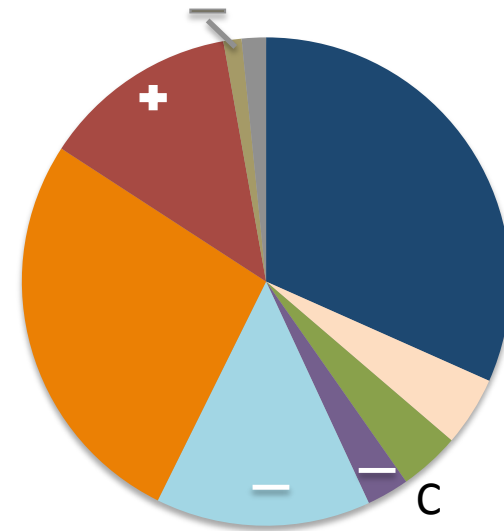

C

### UCLUST OTUs 99%

### Eurybathic OTUs 99%

### Cosmopolitan Deep-sea OTUs 99%

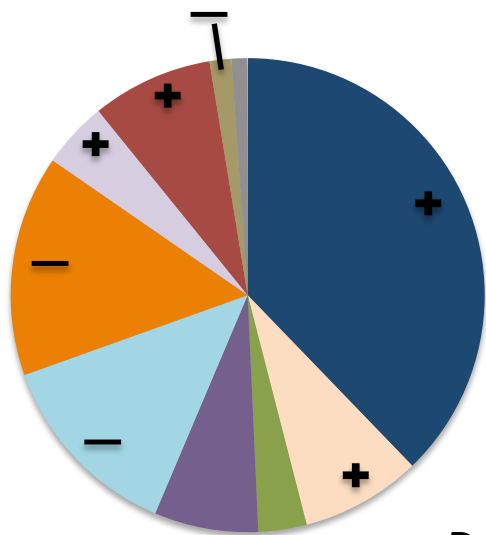

D

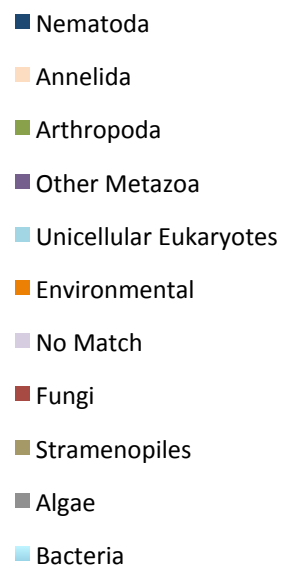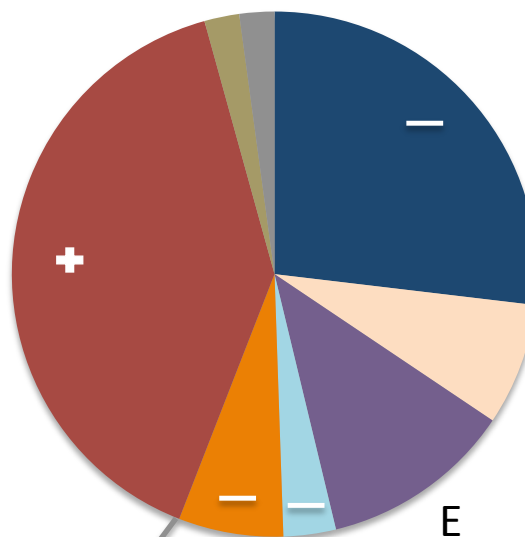

E

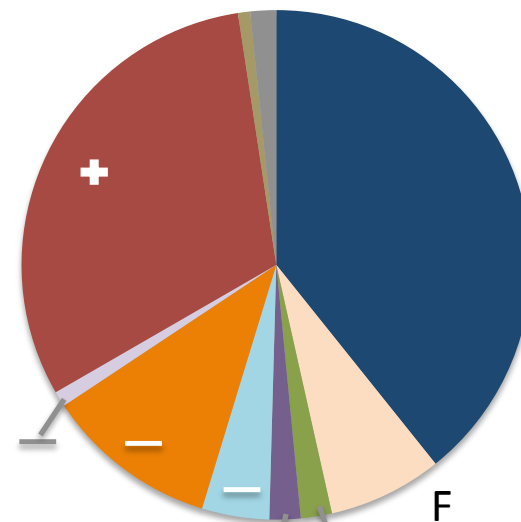

F

### Nematode OCTUs 95%

## Fig S5

### Eurybathic Nematodes 95%

### Cosmopolitan Deep-sea Nematode OCTUs 95%

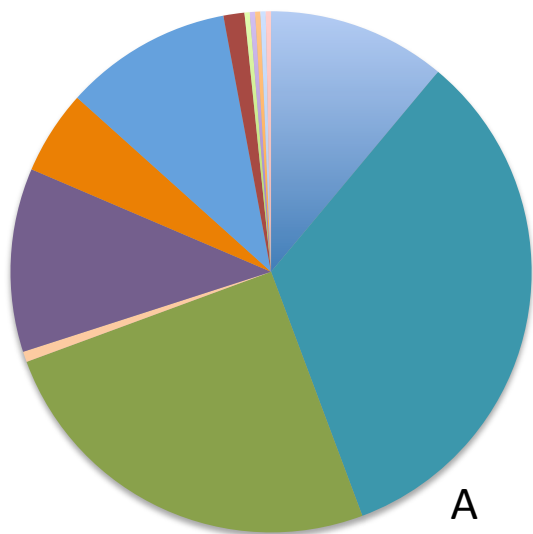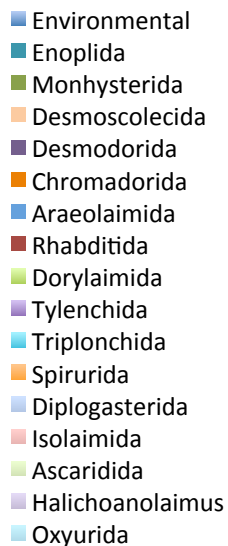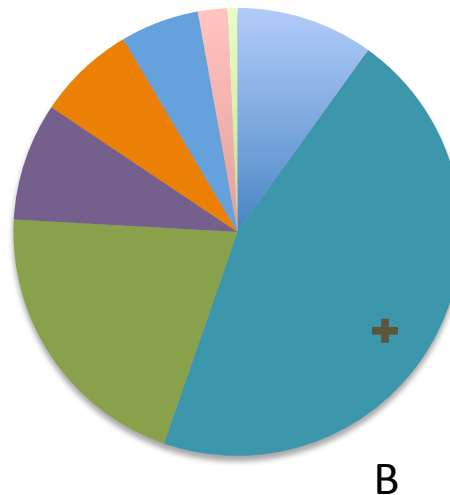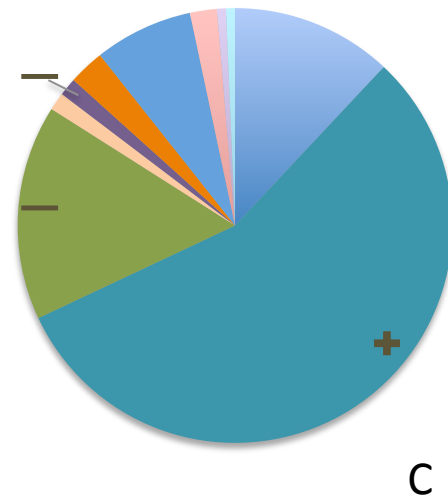

### Nematode OCTUs 99%

### Eurybathic Nematodes 99%

### Cosmopolitan Deep-sea Nematode OCTUs 99%

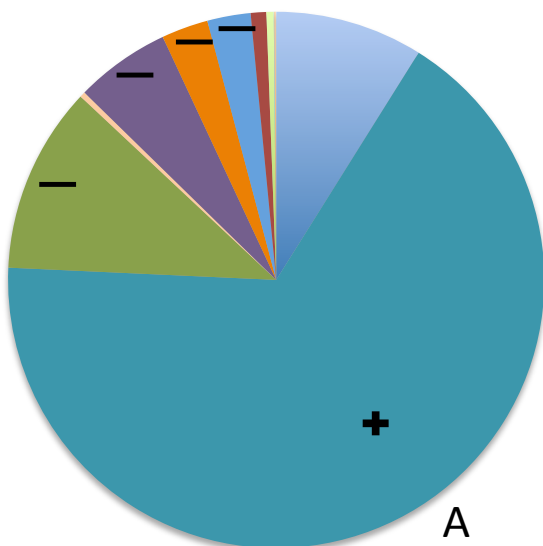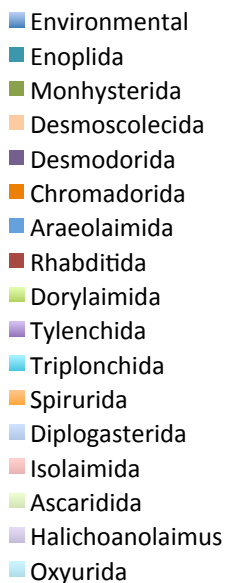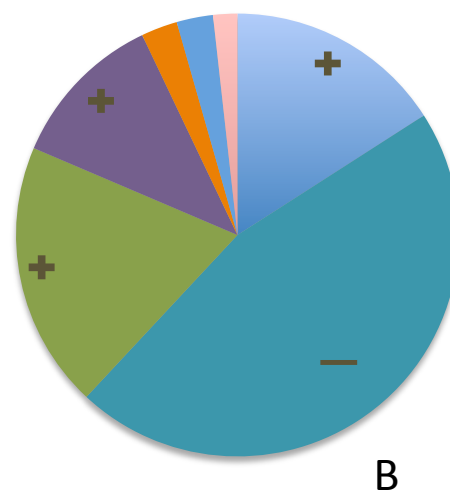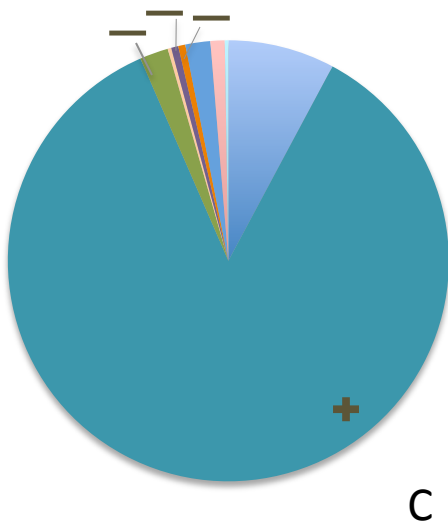

Supplement: NIHMS323120-supplement-Supp_Table_S1-S2___Fig_S1-S5.pdf [file NIHMS323120-supplement-Supp_Table_S1-S2___Fig_S1-S5.pdf]
